# Supplementary material for: Young Adult Utilization of a Smoking Cessation Website: An Observational Study Comparing Young and Older Adult Patterns of Use
Source: PubMed Central journal article supplement (PMC4960403; doi:10.2196/resprot.4881), 2016-07-11
Supplement: resprot_v5i3e142_app2.pdf [file resprot_v5i3e142_app2.pdf]

**Multimedia Appendix 2.** Bivariate analyses of website utilization metrics for aged 18-24, 25-34 and 35+.

|                               | <b>Young Adults<br/>18-24<br/>(n=957)</b> | <b>Young Adults<br/>25-34<br/>(n=2,073)</b> | <b>Older Adults<br/>35+<br/>(n=2,953)</b> | <b>18-24<br/>vs. 25-34<br/>P-value</b> | <b>18-24<br/>vs. 35+<br/>P-value</b> | <b>25-34<br/>vs. 35+<br/>P-value</b> |
|-------------------------------|-------------------------------------------|---------------------------------------------|-------------------------------------------|----------------------------------------|--------------------------------------|--------------------------------------|
| <b>Site visits</b>            |                                           |                                             |                                           |                                        |                                      |                                      |
| Mean (SE)                     | 2.32 (0.15)                               | 2.61 (0.21)                                 | 7.59 (1.41)                               | .14                                    | <.001                                | <.001                                |
| Median (IQR)                  | 1.00 (1.00)                               | 1.00 (1.00)                                 | 1.00 (2.00)                               |                                        |                                      |                                      |
| 1 time, N (%)                 | 676 (70.64)                               | 1,507 (72.70)                               | 1,671 (56.59)                             |                                        |                                      |                                      |
| 2-3 times, N (%)              | 159 (16.61)                               | 368 (17.75)                                 | 758 (25.67)                               |                                        |                                      |                                      |
| 4-8 times, N (%)              | 85 (8.88)                                 | 126 (6.08)                                  | 341 (11.55)                               |                                        |                                      |                                      |
| > 8 times, N (%)              | 37 (3.87)                                 | 72 (3.47)                                   | 183 (6.20)                                |                                        |                                      |                                      |
| <b>Time on site, minutes;</b> |                                           |                                             |                                           |                                        |                                      |                                      |
| Mean (SE)                     | 28.50 (3.91)                              | 27.12 (3.04)                                | 140.42 (32.84)                            | .003                                   | <.001                                | <.001                                |
| Median (IQR)                  | 5.95 (17.37)                              | 4.52 (15.48)                                | 10.98 (26.85)                             |                                        |                                      |                                      |
| < 3 minutes, N (%)            | 345 (36.05)                               | 887 (42.81)                                 | 713 (24.15)                               |                                        |                                      |                                      |
| 4-30 minutes, N (%)           | 449 (46.92)                               | 881 (42.52)                                 | 1,497 (50.71)                             |                                        |                                      |                                      |
| 31+ minutes, N (%)            | 163 (17.03)                               | 304 (14.67)                                 | 742 (25.14)                               |                                        |                                      |                                      |
| <b>Pages viewed;</b>          |                                           |                                             |                                           |                                        |                                      |                                      |
| Mean (SE)                     | 67.50 (15.63)                             | 30.41 (3.32)                                | 113.01 (23.61)                            | .001                                   | <.001                                | <.001                                |
| Median (IQR)                  | 10.00 (20.00)                             | 8.00 (17.00)                                | 14.00 (26.00)                             |                                        |                                      |                                      |
| Used EX Community; N(%)       | 91 (9.51)                                 | 236 (11.38)                                 | 387 (13.11)                               | .12                                    | .003                                 | .07                                  |
| Used Separation               | 71 (7.42)                                 | 161 (7.77)                                  | 366 (12.39)                               | .738                                   | <.001                                | <.001                                |
| <b>Exercises, N (%)</b>       |                                           |                                             |                                           |                                        |                                      |                                      |

Abbreviations: N – sample size; SE – standard error; IQR – interquartile range
